# Supplementary material
Source: PubMed Central journal article supplement (PMC4171710)

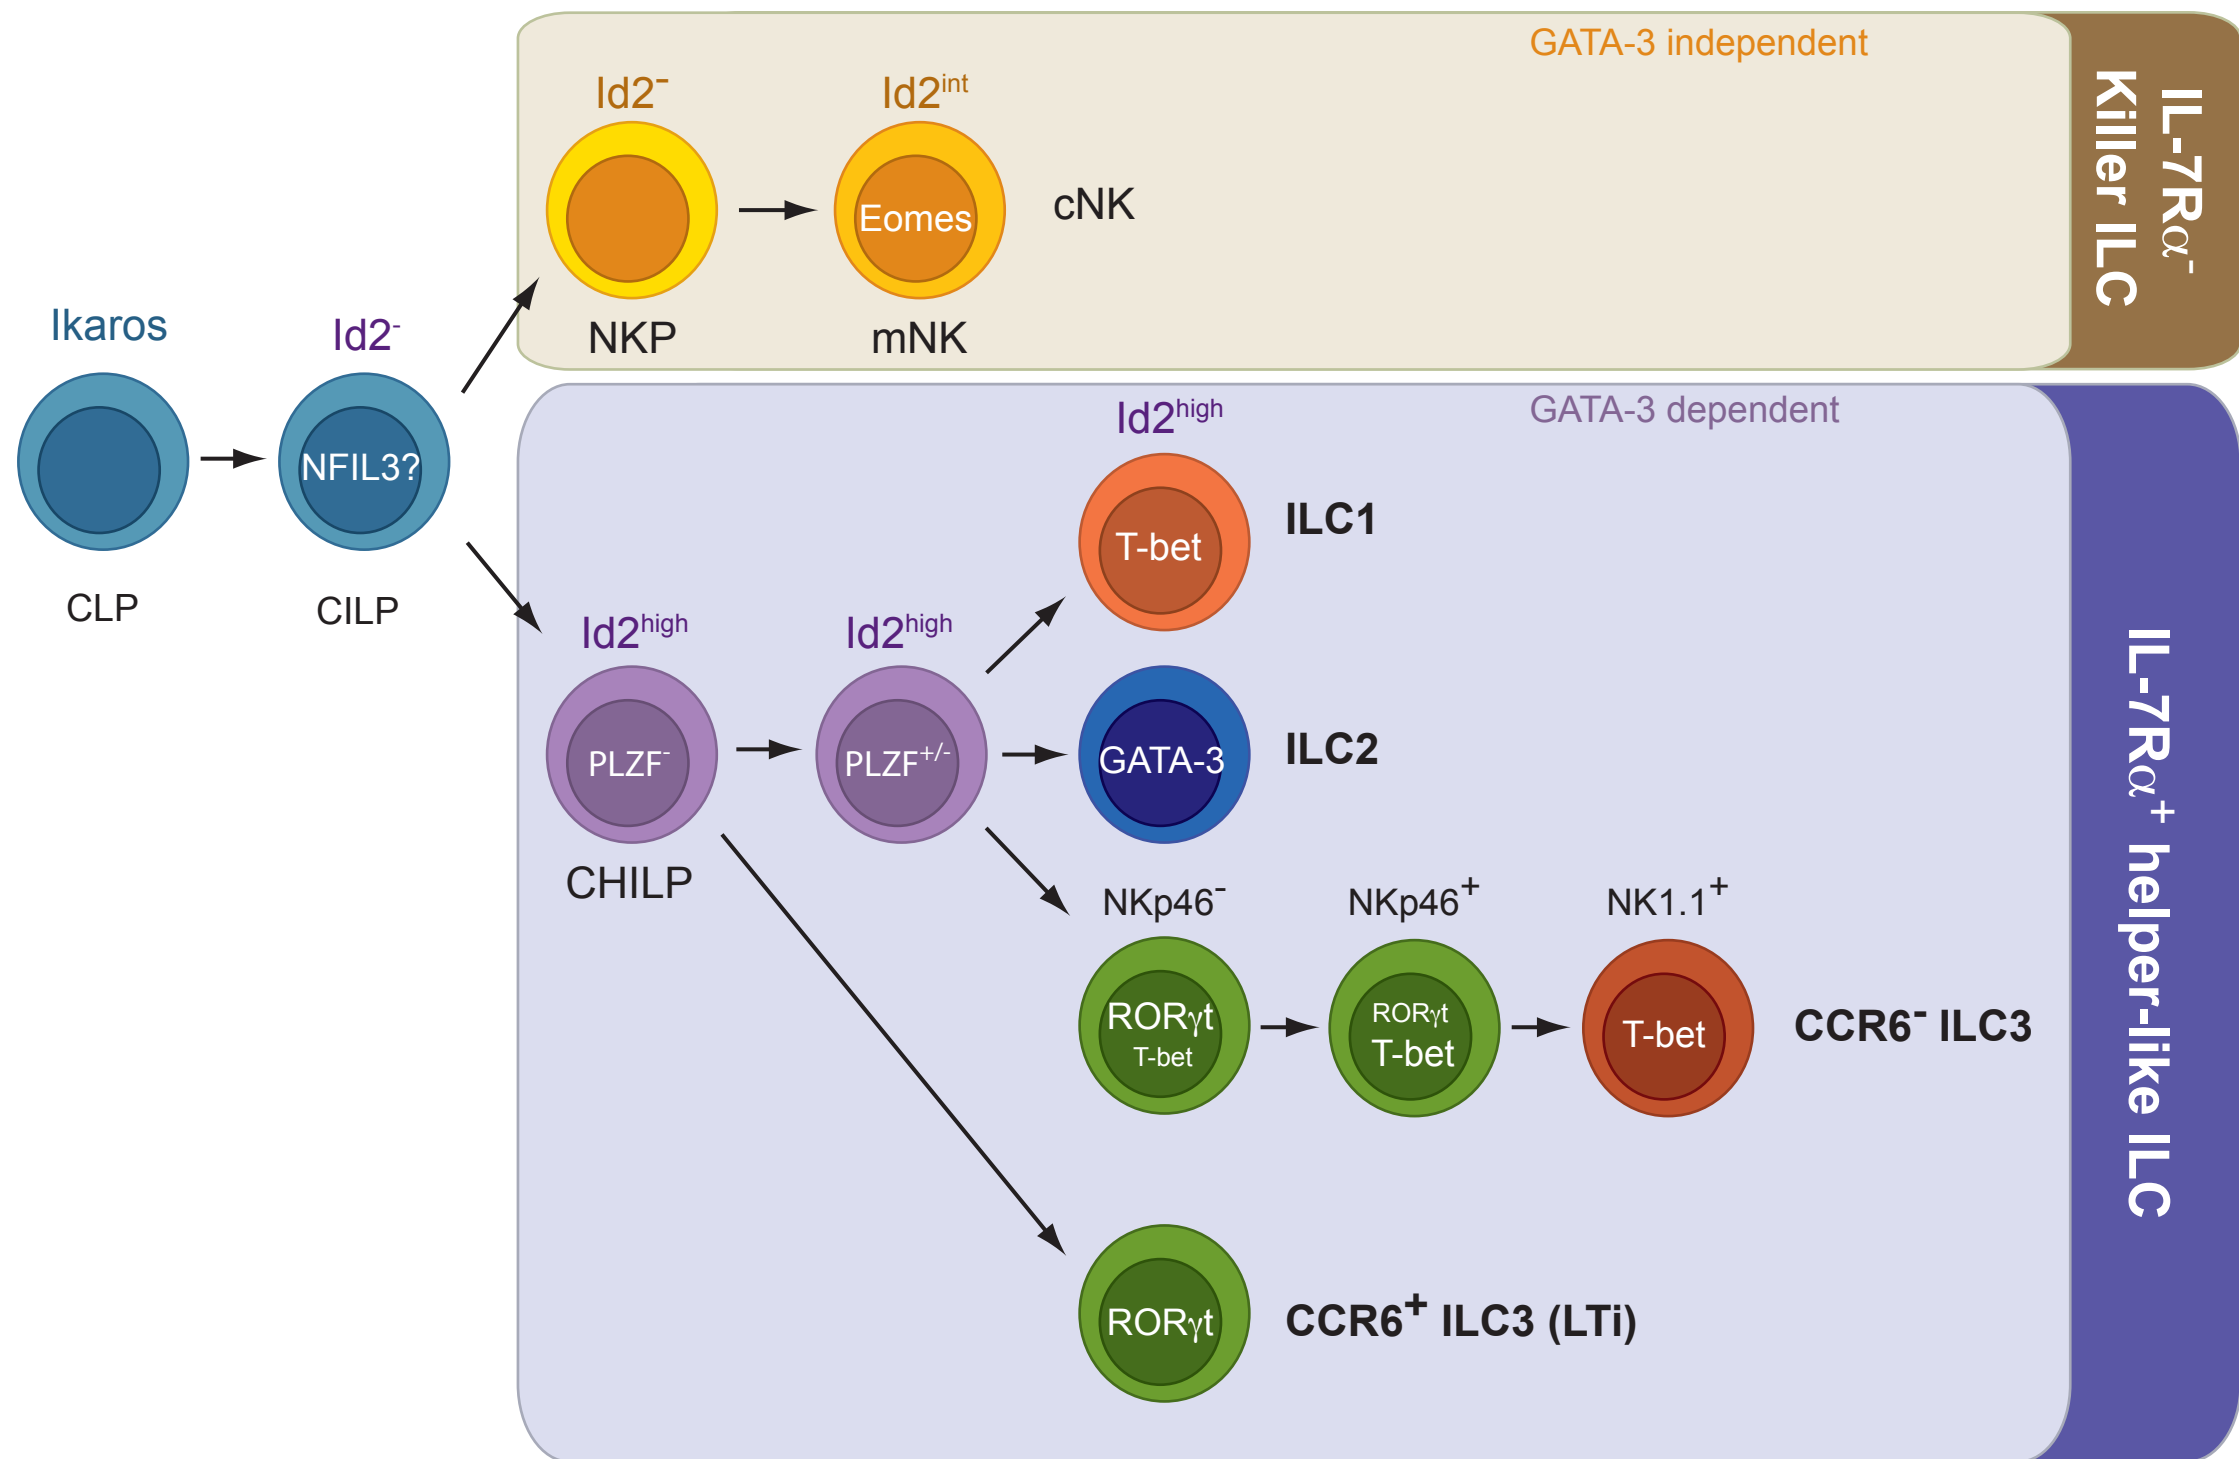

Supplement: NIHMS627210-supplement.pdf [file NIHMS627210-supplement.pdf]
